# Supplementary material for: RNF41 interacts with the VPS52 subunit of the GARP and EARP complexes
Source: PLoS One. 2017 May 22;12(5):e0178132. doi: 10.1371/journal.pone.0178132 (PMC5439944; doi:10.1371/journal.pone.0178132)
Supplement: S3 Table — (XLSX) [file pone.0178132.s003.xlsx]

## Sheet: Sheet1
pMG1-VPS52	huORF5.1	pMG1	LR reaction
pMET7-Flag-VPS52		Flag-pMET7
pMET7-VPS52-Flag		pMET7-Flag
pMET7-Etag-VPS52		Etag-pMET7
pMET7-VPS52-Etag		pMET7-Etag
		(De Ceuninck et al, 2013; Lievens et al, 2009)
pCLG-RNF41 C34S/H36Q bait	pSEL-RNF41	pCLG	SacI-NotI + mutagenesis	5’-GTACAGGCACCTCATTGTGAACATGCTTTCTGCAACGCC-3’
	(De Ceuninck et al, 2013)			5’-GGCGTTGCAGAAAGCTTGTTCACTATGAGGTGCCTGTAC-3’
RNF41 C34S/H36Q bait	pCLG-RNF41 C34S/H36Q	pSEL	SacI-NotI
RNF41 C43S/H36Q L163Q bait	RNF41 C34S/H36Q bait		mutagenesis	5'-GAACACAAACACCAGCAGGCGGAGCAGAAGCGAGACATCCAGC-3’
pMET7-RNF41L163Q	pMET7-RNF41 (De Ceuninck et al, 2013)			5’-GCTGGATGTCTCGCTTCTGCTCCGCCTGCTGGTGTTTGTGTTC-3’
pMET7-RNF41L163Q-Flag	pMET7-RNF41-Flag
RNF41 N-terminal bait	pMET7-RNF41-Etag	pSEL-FKBP12 (Eyckerman et al, 2001)	SacI-NotI	5’-GCGGAGCTCGATGGGGTATGATGTAACCCGTTTCC-3’
				5’-CGCGCGGCCGCTTAGCAGTTATGGTTGGGCAGCTC-3’
RNF41 C-terminal bait	pMET7-RNF41-Etag	pSEL-FKBP12	SacI-NotI	5’-GCGGAGCTCGATTAAGCACCTGCGCTCAGTGG-3’
				5’-CGCGCGGCCGCTTATATCTCTTCCACGCCATGCG-3’
RNF41 substrate binding bait	pMET7-RNF41-Etag	pSEL-FKBP12	SacI-NotI	5’-GCGGAGCTCGGCAATCCGCAGTGTC-3’
				5’-CGCGCGGCCGCTTATATCTCTTCCACGCCATGCG-3’
RNF41 CC bait	pMET7-RNF41-Etag	pSEL-FKBP12	SacI-NotI	5’-GCCGAGCTCCATGATTAAGCACCTGCGCTCAGTGG-3’
	(Wauman et al, 2011)			5’- CCTGCGGCCGCTTTAACGCATGTATGCCTTTAGCAGC-3’
pMET7-VPS52	pMET7-VPS52-Flag		mutagenesis	5’-GCCCAACTTCTGACCAACTTTC-3’
				5’-GAAAGTTGGTCAGAAGTTGGGC-3’
pMET7-VPS52 DEE/RRA-Flag	pMET7-VPS52-Flag		mutagenesis	5’-TCTCTACACAACCAGATCACAGCCTGTCGTGCAGTCCTGCGGCGAA TGGCGCAGATGTTGGGAGCTTTTCAGG-3’
pMG1-VPS52 DEE/RRA	pMG1-VPS52			5’-CACTCTGAAAAGCTCCCAACATCTGCGCCATTCGCCGCAGGACTGCA CGACAGGCTGTGATCTGGTTGTGTAGAGA-3’
pMET7-VPS52∆CC-Flag	pMet7-VPS52-Flag		Mutagenesis 1	5’- CAACCAGATCACAGCCTGTGATGTCGACCTGGAGCGAATGGAGC-3’
				5’- GCTCCATTCGCTCCAGGTCGACATCACAGGCTGTGATCTGGTTG-3’
			Mutagenesis 2	5’-CTGAGATCCGGACACTGCAGGAAGTCGACGGAGCCATGAACATTCGAC-3’
			+ SalI digest	5’- GTCGAATGTTCATGGCTCCGTCGACTTCCTGCAGTGTCCGGATCTCAG-3’
pMET7-VPS52∆CC	pMET7-VPS52∆CC-FLag	pMET7	EcoRV-DraIII
pMG-VPS52∆CC		pMG1
pMG1-VPS52 CC	pMET7-VPS52	pMG1	EcoRI-NotI	5’-GCCGAATTCGCCATGGCTGTCCTGGAGCG-3’
				5’-GCGCGGCCGCTTTATGACTGTTCCTGCAG-3’ or
pMET7-VPS52 CC-Flag		pMET7-flag		5’-GCGCGGCCGCTTGACTGTTCCTGCAGTG-3’
pcDNA3.1-Flag-VPS52	pMET7-Flag-VPS52	pCDNA3.1 vector	Mutagenesis + AflII-XbaI	5’-TGCGGGCCCTTAAGCATGGATTAC-3’
				5’-GTAATCCATGCTTAAGGGCCCGCA-3’
pMET7-RNF41-Flag	pMET7-RNF41-Etag		XhoI-XbaI	5’-TCGAGGATTACAAGGATGACGACGATAAGTAAT-3’
pMET7-RNF41 Nterm-Flag	pMET7-RNF41 Nterm-Etag			5’- CTAGATTACTTATCGTCGTCATCCTTGTAATCC-3’
pMET7- C-term-Flag	pMEt7-RNF41 Cterm-Etag
pMET7-RNF41 CC-Flag	pMet7-RNF41-Flag	pMET7	EcoRI-NotI	5’-GCCGAATTCACCATGATTAAGCACCTGCGC-3’
				5’-CCTGCGGCCGCTCCCACGCATGTATGCCTTTAGCAGC-3’
pMET7- substr-Flag	pSEL-RNF41 substr	pMET7	EcoRI-NotI	5’-GCGAATTCGCCATGGCAATCCGCAGTGTCAACCCC-3’
				5’-CTAGATTAGCGGCCGCGTATCTCTTCCACGCCATGCGCAAA-3’
pMET7-RNF41∆CC-Flag	pMET7-RNF41-Flag		Mutagenesis 1	5’-CCCAACCATAACTGCGATATCCACCTGCGCTCAGTG-3’
pMET7-RNF41∆CC-Etag	pMET7-RNF41-Etag		Mutagenesis 2	5’-CACTGAGCGCAGGTGGATATCGCAGTTATGGTTGGG-3’
pSEL-RNF41∆CC = RNF41∆CC bait	pSEL-RNF41		+ EcoRV digest	5’-CTGCTAAAGGCATACGATATCGCAATCCGCAGTGTC-3’
				5’-GACACTGCGGATTGCGATATCGTATGCCTTTAGCAG-3’
pMET7-VPS53	Hela cDNA	pMET7	EcoRI-PsiI	5’-GTCCGGAGAATTCGCCATGATGGAGGAGGAGGAACTGGAGTTCG-3’
				5’-CCCTTATAAGCGGCCGCCCCCTACAGTCTCTTTTTAATGAGTTTCTC-3’
pMET7-VPS53-Flag	Hela cDNA	pMET7-Flag	EcorI-NotI	5’- GTCCGGAGAATTCGCCATGATGGAGGAGGAGGAACTGGAGTTCG-3’
				5’-GGCCGCGGCCGCCCCACAGTCTCTTTTTAATGAG-3’
pXP2d2-rPAP1-luficerase reporter
pMET7-Flag-SVT
PMET7-RNF41 DN
(Wauman et al, 2011)
pGEX-4T-GST-RNF41
pMet7-sIL-5Rα
(De Ceuninck et al, 2013)
